# Supplementary material
Source: Springer Nature journal article supplement (https://www.springermedizin.de/resource/supplementary/13033_2010_83_MOESM3_ESM.pdf/9651788)

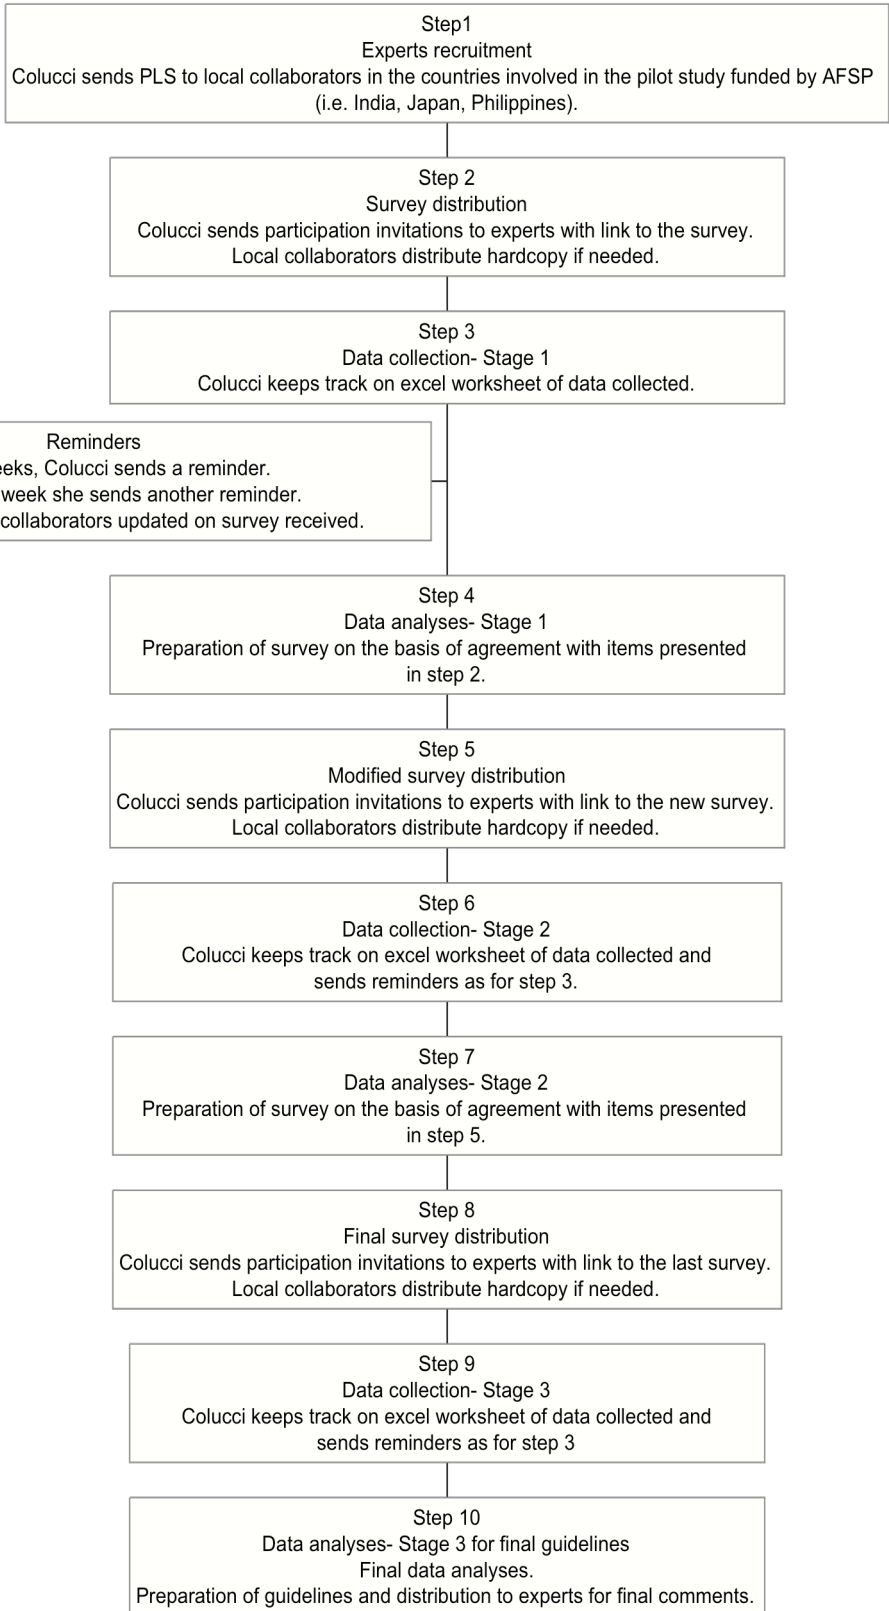

Supplement: MOESM3 [file 9651788]
